# Supplementary material for: Clinical outcomes associated with Staphylococcus aureus and Pseudomonas aeruginosa airway infections in adult cystic fibrosis patients
Source: Springer Nature journal article supplement (doi:10.1186/s12890-015-0062-7), 2015-06-20
Supplement: MOESM1 [file 9751828]

## Supplemental information

**Table S1. Sputum microbiology for other microorganisms in sputum cultures**

|                                     | No PA/SA | SA only | PA       |
|-------------------------------------|----------|---------|----------|
| <i>Stenotrophomonas maltophilia</i> | 1 (7%)   | 2 (10%) | 4(8%)    |
| <i>Aspergillus</i> species          | 5 (36%)  | 4 (20%) | 12 (24%) |

Values expressed in n (%) of patients with at least one positive culture for *Aspergillus* species or *Stenotrophomonas maltophilia*.

**Table S2. Clinical characteristics of patients according to their airway infection status**

|                                              | No PA/SA     | SA only      | PA+SA        | PA only      | <i>P-value</i> *            |
|----------------------------------------------|--------------|--------------|--------------|--------------|-----------------------------|
| n (%)                                        | 14 (16.7%)   | 20 (24.1%)   | 10 (12.0%)   | 40 (48.2%)   | -                           |
| Age (years)                                  | 30.9 (±13.7) | 28.5 (±12.2) | 30.5 (±9.1)  | 36.8 (±13.4) | 0.09                        |
| Female sex (%)                               | 8 (57.1%)    | 9 (45.0%)    | 5 (50.0%)    | 20 (50.0%)   | -                           |
| BMI                                          | 21.1 (±2.5)  | 22.5 (±3.5)  | 22.1 (±3.4)  | 21.9 (±4.7)  | 0.80                        |
| FEV <sub>1</sub> (% predicted)               | 70.9 (±21.0) | 66.5 (±22.1) | 52.9 (±20.6) | 57.1 (±28.8) | 0.18                        |
| FVC (% predicted)                            | 85.8 (±22.1) | 82.8 (±19.3) | 69.3 (±20.8) | 73.6 (±27.7) | 0.20                        |
| <b>Exacerbation rate</b>                     | 0.43         | 0.20         | 0.90         | 1.27         | <b>&lt;0.01</b>             |
| Hospitalization rate                         | 0.21         | 0.15         | 0.90         | 0.5          | <0.15                       |
| <b>Total clinical score<br/>(out of 95)</b>  | 71.1 (±14.1) | 68.6 (±10.9) | 62.3 (±13.6) | 60.4 (±15.0) | <b>0.04</b>                 |
| Clinical subscore<br>(out of 45)             | 35.3 (±4.6)  | 35.1 (±3.3)  | 33.9 (±3.5)  | 32.8 (±3.9)  | 0.08                        |
| <b>Radiographic<br/>subscore (out of 25)</b> | 18.9 (±4.0)  | 17.7 (±2.9)  | 15.4 (±2.5)  | 16.0 (±2.8)  | <b>&lt;0.01<sup>1</sup></b> |
| Pulmonary function<br>subscore (out of 25)   | 18.5 (±5.1)  | 18.0 (±5.1)  | 14.9 (±5.6)  | 15.4 (±6.4)  | 0.17                        |
| Complication<br>subscore (out of 37)         | 1.5 (±2.3)   | 2.3 (±2.6)   | 1.9 (±3.8)   | 3.8 (±4.3)   | 0.14                        |
| <b>CRP<sup>†</sup></b>                       | 2.50 (±3.5)  | 4.8 (±3.2)   | 11.1 (±8.5)  | 10.4 (±10.5) | <b>0.01<sup>2</sup></b>     |

SA = *Staphylococcus aureus*; PA = *Pseudomonas aeruginosa*; SD = standard deviation; BMI = body mass index; FEV<sub>1</sub> = forced expiratory volume in 1 second; FVC = forced vital capacity; CRP = C-reactive protein.

Values expressed in: n (%) or mean (± SD), except for the exacerbation and hospitalization rates expressed as mean rates calculated by Poisson regression.

\* P-values were determined using the ANOVA or Chi-squared test. For exacerbation rate and hospitalization rate, P-values were determined by a comparison with a null model.

Comparisons between groups were done using Tukey's test. Tukey's test reported the following differences: <sup>1</sup> p<0.05, "No PA/SA" vs. "PA+SA", "No PA/SA" vs. "PA only"

<sup>2</sup> p<0.05, "No PA/SA" vs. "PA only"

† CRP data was not available for all patients and results in Table 2 were collected from the different groups are as follows: Group 1: 11/14; Group 2: 16/20; Group 3: 7/10; Group 4: 28/40.

**Table S3. Association between infection status and FEV<sub>1</sub> % (PA+SA excluded)**

|          | Crude                  |              |         | Adjusted               |              |         |
|----------|------------------------|--------------|---------|------------------------|--------------|---------|
|          | Regression Coefficient | 95% CI       | P-value | Regression Coefficient | 95% CI       | P-value |
| No PA/SA | 13.7                   | -2.0 to 29.5 | 0.091   | 13.4                   | -2.7 to 29.6 | 0.108   |
| SA only  | 9.3                    | -4.5 to 23.2 | 0.192   | 8.4                    | -6.2 to 23.0 | 0.263   |
| PA       | 0                      | Reference    | -       | 0                      | Reference    | -       |

Regression coefficients were calculated using a linear regression. The adjusted model includes age and sex as covariates.

**Table S4. Association between infection status and exacerbation rate (PA+SA excluded)**

|          | Crude      |                   |               | Adjusted   |                    |               |
|----------|------------|-------------------|---------------|------------|--------------------|---------------|
|          | Risk Ratio | 95% CI            | P-value       | Risk Ratio | 95% CI             | P-value       |
| No PA/SA | <b>0.3</b> | <b>0.1 to 0.8</b> | <b>0.012</b>  | <b>0.3</b> | <b>0.1 to 0.7</b>  | <b>0.004</b>  |
| SA only  | <b>0.2</b> | <b>0.1 to 0.4</b> | <b>0.0004</b> | <b>0.1</b> | <b>0.05 to 0.4</b> | <b>0.0001</b> |
| PA       | 1.0        | Reference         | -             | 1.0        | Reference          | -             |

Risk ratios were calculated using a Poisson regression. The adjusted model includes age and sex as covariates.

**Table S5. Association between infection status and C-reactive protein (PA+SA excluded)**

|          | Crude                  |                      |              | Adjusted               |                      |              |
|----------|------------------------|----------------------|--------------|------------------------|----------------------|--------------|
|          | Regression Coefficient | 95% CI               | P-value      | Regression Coefficient | 95% CI               | P-value      |
| No PA/SA | <b>-7.9</b>            | <b>-13.4 to -2.4</b> | <b>0.007</b> | <b>-7.9</b>            | <b>-13.6 to -2.3</b> | <b>0.008</b> |
| SA only  | <b>-5.6</b>            | <b>-10.5 to -0.8</b> | <b>0.028</b> | <b>-5.5</b>            | <b>-10.7 to -0.3</b> | <b>0.045</b> |
| PA       | 0                      | Reference            | -            | 0                      | Reference            | -            |

Regression coefficients were calculated using a linear regression. The adjusted model includes age and sex as covariates.

**Table S6. Association between infection status and total clinical score (PA+SA excluded)**

|          | Crude                  |                    |              | Adjusted               |                    |              |
|----------|------------------------|--------------------|--------------|------------------------|--------------------|--------------|
|          | Regression Coefficient | 95% CI             | P-value      | Regression Coefficient | 95% CI             | P-value      |
| No PA/SA | <b>10.6</b>            | <b>2.2 to 19.1</b> | <b>0.016</b> | <b>10.6</b>            | <b>2.0 to 19.2</b> | <b>0.018</b> |
| SA only  | <b>8.2</b>             | <b>0.7 to 15.6</b> | <b>0.034</b> | 7.6                    | -0.1 to 15.4       | 0.058        |
| PA       | 0                      | Reference          | -            | 0                      | Reference          | -            |

Total clinical score is marked out of 95 points. Regression coefficients were calculated using a linear regression. The adjusted model includes age and sex as covariates.
